# Supplementary material for: Expression of USP18 and IL2RA Is Increased in Individuals Receiving Latent Tuberculosis Treatment with Isoniazid
Source: J Immunol Res. 2019 Dec 6;2019:1297131. doi: 10.1155/2019/1297131 (PMC6925913; doi:10.1155/2019/1297131)
Supplement: Supplementary Materials — Data set of IGRA-positive and IGRA-negative individuals, Time of sampling and qPCR data set for all the assessed genes. [file 1297131.f1.xlsx]

## Sheet: Main
Supplementary data for the paper in Journal of Immunolofy Rsearch:
Eleane de Oyarzabal, et al.
Content
1.-Data Set IGRA positive
2.-Data Set IGRA negative
3.- Time of sampling IGRA positive
4.- Time of sampling IGRA negative
5.-qPCR CXL-10
6.-qPCR CXCL-11
7.- qPCR CCL4
8- qPCR IFI44
9.- qPCR IFI44L
10.- qPCR IFNA
11.- qPCR RSAD2
12.- qPCR IL2RA
13.- qPCR USP18
14.- qPCR IFIT1

## Sheet: IGRA Positive
	ID	Age (years)	Gender Female=1, Male=2	BCG vaccine Negative=0, Positive=1	TST (mm)	IGRA	ESAT-6	CFP-10	PPD	PHA
	P1	40	2	1	12	Positive	174.7	2564.8	11728.8	17428.8
	P2	37	1	1	13	Positive	0	134.69	27702	311499
	P3	37	2	1	14	Positive	445.293	3299	7185	16149
	P4	45	1	1	11	Positive	0	0	14269.2	11419.2
	P5	36	1	1	13	Positive	457.79	1999.09	67800	64190.9
	P6	31	1	1	12	Positive	380.563	336.998	9482.32	12832.3
	P7	43	1	1	22	Positive	396.523	474.179	14986.1	29077.6
	p8	26	2	1	10	Positive	0	2383.22	177.822	11220
	P9	39	2	1	11	Positive	389.445	0	17	10889.7
	P10	42	1	0	13	Positive	0	1744.71	13375.9	46754.6
	P11	42	1	1	14	Positive	0	0	23.82	2747.7
	P12	27	1	1	11	Positive	240.469	0	4832.57	22653.8
	P13	43	2	1	10	Positive	934.89	3489.56	ND	4222.97
	P14	41	1	1	11	Positive	0	556.955	8436.6	38653.7
	P15	49	2	0	12	Positive	243.98	386.444	1614.2	13740.2
	P16	49	1	0	15	Positive	245.14	182.51	26513	5865.96
	P17	40	2	1	12	Positive	2628.43	0	34502.4	52443.4
	P18	52	2	1	12	Positive	0	1200	55874	70724
	p19	65	2	1	13	Positive	3933.17	8771.74	17963.3	29712.8
	P20	28	1	1	15	Positive	0	652	30989.7	72915.2
	P21	45	1	1	19	Positive	8051.16	69983	32847.8	59433
	P22	19	2	0	10	Positive	239.512	0	119.317	29480.5
	P23	57	1	0	13	Positive	542.656	14025.2	36553.8	84026.1
	P24	45	1	1	15	Positive	217.1	7284.1	43575.1	39425.1
	P25	21	2	1	14	Positive	1490.69	0	12082	12889.6

## Sheet: IGRA Negative
	ID	Age (years)	Gender Female=1, Male=2	BCG vaccine Negative=0, Positive=1	TST (mm)	IGRA	ESAT6	CFP10	PPD	PHA
	P1	20	2	1	11	Negative	0	17.5051	343.11	3913.53
	P2	47	1	0	10	Negative	5.05474	49.7912	11674.7	26921.3
	P3	57	1	1	18	Negative	20.9916	27.9651	585.68	19874
	P4	35	1	0	15	Negative	0	17.7357	2012.63	57820.4
	P5	21	1	1	12	Negative	19.1478	7.84753	945.066	3834.87
	P6	59	1	1	10	Negative	14.5581	6.41563	834.16	88396.7
	P7	47	2	1	11	Negative	3.14745	71.8988	704.32	1323.32
	P8	21	2	1	10	Negative	3.5834	2.8598	21435.8	28630.6
	P9	47	2	0	14	Negative	0	41.0819	14547.9	16147.9
	P10	33	1	1	15	Negative	0	0	340	12879.1
	P11	33	2	1	13	Negative	0	4.4	746	6180
	P12	41	1	1	13	Negative	0	0	3127.55	28501.6
	P13	32	1	0	12	Negative	0	0	14550	16150
	P14	45	1	1	13	Negative	0	0	29600	53688.2

## Sheet: Time Sampling IGRA Positive
		Time (months)
	Season	t0	t1	t6
	Spring	14	8	10
	Summer	6	8	2
	Autum	3	9	4
	Winter	2	0	9
	Total of samples	25	25	25

## Sheet: Time Sampling IGRA Negative
		Time (months)
	Season	t0	t1	t6
	Spring	4	6	6
	Summer	4	3	2
	Autum	4	5	5
	Winter	2	0	1
	Total of samples	14	14	14

## Sheet: cxcl10
	CXCL-10 T0												CXCL-10 T1												CXCL-10 T6
No.	Sample Name	Target Name	Cт Mean		Sample Name	Target Name	Cт Mean	∧CT	∧∧CT	2 -∧∧CT	RQ vs 18S		Sample Name	Target Name	Cт Mean		Sample Name	Target Name	Cт Mean	∧CT	∧∧CT	2 -∧∧CT	RQ vs 18S		Sample Name	Target Name	Cт Mean		Sample Name	Target Name	Cт Mean	∧CT	∧∧CT	2 -∧∧CT	RQ vs 18S
1	neg P1 T0	18S	20.8739		neg P1 T0	CXCL10	35.6828	14.809	0	1	3.48381e-05		neg P1 T1	18s	15.8586		neg P1 T1	CXCL10	Undetectable						neg P1 T6	18S	19.1389		neg P1 T6	CXL10	Undetectable
2	neg P2 T0	18S	18.0532		neg P2 T0	CXCL10	Undetectable						neg P2 T1	18s	21.9915		neg P2 T1	CXCL10	10.2677	-11.7237			3382.1	**	neg P2 T6	18S	*		neg P2 T6	CXL10						**
3	neg P3 T0	18S	17.3757		neg P3 T0	CXCL10	Undetectable						neg P3 T1	18s	17.303		neg P3 T1	CXCL10	Undetectable					**	neg P3 T6	18S	16.9771		neg P3 T6	CXL10	22.5626					**
4	neg P4 T0	18S	19.0008		neg P4 T0	CXCL10	31.584	12.5833	0	1	0.000162952		neg P4 T1	18s	17.4627		neg P4 T1	CXCL10	Undetectable						neg P4 T6	18S	14.3968		neg P4 T6	CXL10	21.5928	7.19608	-5.38719	41.8509	0.00681968
5	neg P5 T0	18S	20.5325		neg P5 T0	CXCL10	33.6556	13.1231	0	1	0.000112085		neg P5 T1	18s	16.4042		neg P5 T1	CXCL10	Undetectable						neg P5 T6	18S	17.0666		neg P5 T6	CXL10	Undetectable
6	neg P6 T0	18S	*		neg P6 T0	CXCL10							neg P6 T1	18s	20.1618		neg P6 T1	CXCL10	Undetectable					**	neg P6 T6	18S	18.9069		neg P6 T6	CXL10	Undetectable					**
7	neg P7 T0	18S	18.1342		neg P7 T0	CXCL10	33.6094	15.4752	0	1	2.19531e-05		neg P7 T1	18s	17.9266		neg P7 T1	CXCL10	Undetectable						neg P7 T6	18S	17.6402		neg P7 T6	CXL10	Undetectable
8	neg P8 T0	18S	20.9573		neg P8 T0	CXCL10	36.3775	15.4203	0	1	2.28053e-05		neg P8 T1	18s	17.6686		neg P8 T1	CXCL10	Undetectable						neg P8 T6	18S	18.6739		neg P8 T6	CXL10	Undetectable
9	neg P10 T0	18S	18.6086		neg P10 T0	CXCL10	36.3668	17.7582	0	1	4.51067e-06		neg P10 T1	18s	18.8944		neg P10 T1	CXCL10	Undetectable						neg P10 T6	18S	20.3756		neg P10 T6	CXL10	Undetectable
10	neg P11 T0	18S	17.579		neg P11 T0	CXCL10	32.1352	14.5563	0	1	4.15075e-05		neg P11 T1	18s	15.5502		neg P11 T1	CXCL10	Undetectable						neg P11 T6	18S	20.2139		neg P11 T6	CXL10	29.5421	9.32823	-5.22803	37.4796	0.00155569
11	neg P12 T0	18S	16.4298		neg P12 T0	CXCL10	37.1831	20.7533	0	1	5.6576e-07		neg P12 T1	18s	16.0893		neg P12 T1	CXCL10	35.3391	19.2498	-1.50354	2.83538	1.60414e-06		neg P12 T6	18S	18.0009		neg P12 T6	CXL10	Undetectable
12	neg P13 T0	18S	17.8435		neg P13 T0	CXCL10	34.112	16.2685	0	1	1.26678e-05		neg P13 T1	18s	15.2387		neg P13 T1	CXCL10	Undetectable						neg P13 T6	18S	19.6714		neg P13 T6	CXL10	Undetectable
13	neg P17 T0	18S	19.4666		neg P17 T0	CXCL10	37.6568	18.1902	0	1	3.34361e-06		neg P17 T1	18s	17.3444		neg P17 T1	CXCL10	Undetectable						neg P17 T6	18S	18.7027		neg P17 T6	CXL10	Undetectable
14	neg P18 T0	18S	18.91		neg P18 T0	CXCL10	38.0316	19.1216	0	1	1.75323e-06		neg P18 T1	18s	16.4842		neg P18 T1	CXCL10	Undetectable						neg P18 T6	18S	21.0045		neg P18 T6	CXL10	Undetectable
1	pos P1 T0	18S	15.385		pos P1 T0	CXCL10	37.7352	22.3502	0	1	1.87036e-07		pos P1 T1	18s	17.4069		pos P1 T1	CXCL10	Undetectable						pos P1 T6	18S	17.7339		pos P1 T6	CXL10	35.9763	18.2424	-4.10777	17.2409	3.22467e-06
2	pos P2 T0	18S	16.0501		pos P2 T0	CXCL10	36.8456	20.7954	0	1	5.49485e-07		pos P2 T1	18s	14.9696		pos P2 T1	CXCL10	Undetectable						pos P2 T6	18S	19.6318		pos P2 T6	CXL10	Undetectable
3	pos P3 T0	18S	14.6564		pos P3 T0	CXCL10	Undetectable						pos P3 T1	18s	17.1226		pos P3 T1	CXCL10	Undetectable					**	pos P3 T6	18S	15.8092		pos P3 T6	CXL10	Undetectable					**
4	pos P4 T0	18S	16.5478		pos P4 T0	CXCL10	Undetectable						pos P4 T1	18s	16.138		pos P4 T1	CXCL10	Undetectable					**	pos P4 T6	18S	14.433		pos P4 T6	CXL10	33.835	19.402			1.44346e-06	**
5	pos P5 T0	18S	16.6006		pos P5 T0	CXCL10	Undetectable						pos P5 T1	18s	14.7643		pos P5 T1	CXCL10	Undetectable					**	pos P5 T6	18S	*		pos P5 T6	CXL10						**
6	pos P6 T0	18S	19.3346		pos P6 T0	CXCL10	35.9084	16.5739	0	1	1.02511e-05		pos P6 T1	18s	18.7614		pos P6 T1	CXCL10	Undetectable						pos P6 T6	18S	15.7735		pos P6 T6	CXL10	Undetectable
7	pos P7 T0	18S	17.3691		pos P7 T0	CXCL10	Undetectable						pos P7 T1	18s	16.6969		pos P7 T1	CXCL10	Undetectable					**	pos P7 T6	18S	19.4007		pos P7 T6	CXL10	Undetectable					**
8	pos P8 T0	18S	15.6687		pos P8 T0	CXCL10	Undetectable						pos P8 T1	18s	16.7919		pos P8 T1	CXCL10	Undetectable					**	pos P8 T6	18S	12.3751		pos P8 T6	CXL10	37.7766	25.4015			2.25621e-08	**
9	pos P9 T0	18S	15.0845		pos P9 T0	CXCL10	39.0894	24.0048	0	1	5.94053e-08		pos P9 T1	18s	14.5768		pos P9 T1	CXCL10	Undetectable						pos P9 T6	18S	15.5556		pos P9 T6	CXL10	36.0271	20.4716	-3.53328	11.5777	6.87776e-07
10	pos P10 T0	18S	15.7294		pos P10 T0	CXCL10	Undetectable						pos P10 T1	18s	15.132		pos P10 T1	CXCL10	Undetectable					**	pos P10 T6	18S	16.0934		pos P10 T6	CXL10	37.1121	21.0187			4.70682e-07	**
11	pos P11 T0	18S	15.9302		pos P11 T0	CXCL10	36.5239	20.5937	0	1	6.31948e-07		pos P11 T1	18s	14.3355		pos P11 T1	CXCL10	39.159	24.8235	4.22979	0.0532975	3.36813e-08		pos P11 T6	18S	15.6507		pos P11 T6	CXL10	35.529	19.8783	-0.715349	1.64188	1.03758e-06
12	pos P12 T0	18S	16.5384		pos P12 T0	CXCL10	37.6544	21.116	0	1	4.39994e-07		pos P12 T1	18s	14.383		pos P12 T1	CXCL10	Undetectable						pos P12 T6	18S	17.3367		pos P12 T6	CXL10	Undetectable
13	pos P13 T0	18S	16.331		pos P13 T0	CXCL10	39.0975	22.7665	0	1	1.40154e-07		pos P13 T1	18s	18.5751		pos P13 T1	CXCL10	Undetectable						pos P13 T6	18S	15.8159		pos P13 T6	CXL10	36.3099	20.494	-2.27245	4.83142	6.77143e-07
14	pos P14 T0	18S	16.1019		pos P14 T0	CXCL10	Undetectable						pos P14 T1	18s	18.5835		pos P14 T1	CXCL10	Undetectable					**	pos P14 T6	18S	16.1156		pos P14 T6	CXL10	37.602	21.4864			3.40372e-07	**
15	pos P15 T0	18S	19.7944		pos P15 T0	CXCL10	Undetectable						pos P15 T1	18s	21.8026		pos P15 T1	CXCL10	Undetectable					**	pos P15 T6	18S	17.7465		pos P15 T6	CXL10	37.032	19.2855			1.5649e-06	**
16	pos P16 T0	18S	18.3728		pos P16 T0	CXCL10	Undetectable						pos P16 T1	18s	20.4258		pos P16 T1	CXCL10	Undetectable					**	pos P16 T6	18S	14.025		pos P16 T6	CXL10	Undetectable					**
17	pos P17 T0	18S	18.1239		pos P17 T0	CXCL10	Undetectable						pos P17 T1	18s	17.5554		pos P17 T1	CXCL10	Undetectable					**	pos P17 T6	18S	14.5814		pos P17 T6	CXL10	37.2897					**
18	pos P18 T0	18S	18.8599		pos P18 T0	CXCL10	Undetectable						pos P18 T1	18s	17.7784		pos P18 T1	CXCL10	Undetectable					**	pos P18 T6	18S	13.8029		pos P18 T6	CXL10	36.1208	22.3179			1.91265e-07	**
19	pos P19 T0	18S	19.4118		pos P19 T0	CXCL10	37.6478	18.236	0	1	3.23907e-06		pos P19 T1	18s	18.6262		pos P19 T1	CXCL10	36.3834	17.7572	-0.478836	1.39362	4.51403e-06		pos P19 T6	18S	15.4389		pos P19 T6	CXL10	36.8275	21.3886	3.15262	0.112452	3.6424e-07
20	pos P20 T0	18S	17.6634		pos P20 T0	CXCL10	34.4889	16.8254	0	1	8.61065e-06		pos P20 T1	18s	17.7134		pos P20 T1	CXCL10	Undetectable						pos P20 T6	18S	14.0503		pos P20 T6	CXL10	Undetectable
21	pos P21 T0	18S	21.0502		pos P21 T0	CXCL10	Undetectable						pos P21 T1	18s	18.113		pos P21 T1	CXCL10	Undetectable					**	pos P21 T6	18S	15.8953		pos P21 T6	CXL10	34.3633	18.4679			2.75801e-06	**
22	pos P22 T0	18S	20.1938		pos P22 T0	CXCL10	Undetectable						pos P22 T1	18s	18.0137		pos P22 T1	CXCL10	Undetectable					**	pos P22 T6	18S	16.7767		pos P22 T6	CXL10	37.1877	20.4109			7.17287e-07	**
23	pos P23 T0	18S			pos P23 T0	CXCL10	Undetectable						pos P23 T1	18s	17.8938		pos P23 T1	CXCL10	Undetectable					**	pos P23 T6	18S	*		pos P23 T6	CXL10
24	pos P24 T0	18S	21.0239		pos P24 T0	CXCL10	Undetectable						pos P24 T1	18s	18.353		pos P24 T1	CXCL10	Undetectable					**	pos P24 T6	18S	17.4268		pos P24 T6	CXL10	36.1147	18.6878			2.3681e-06	**
25	pos P26 T0	18S	20.808		pos P26 T0	CXCL10	33.447	12.6391	0	1	0.000156769		pos P26 T1	18s	19.0056		pos P26 T1	CXCL10	36.929	17.9234	5.28431	0.0256604	4.02276e-06		pos P26 T6	18S	32.9234		pos P26 T6	CXL10	Undetectable
	* Insufficient DNA
	** No calibrator available
	Undetectable= the probe was undetected in spite of having sufficient DNA

## Sheet: cxcl11
	CXCL-11 T0												CXCL-11 T1												CXCL-11 T6
No.	Sample Name	Target Name	Cт Mean		Sample Name	Target Name	Cт Mean	∧CT	∧∧CT	2 -∧∧CT	RQ vs 18S		Sample Name	Target Name	Cт Mean		Sample Name	Target Name	Cт Mean	∧CT	∧∧CT	2 -∧∧CT	RQ vs 18S		Sample Name	Target Name	Cт Mean		Sample Name	Target Name	Cт Mean	∧CT	∧∧CT	2 -∧∧CT	RQ vs 18S
1	neg P1 T0	18S	22.0698		neg P1 T0	CXCL11	30.0062	7.93634	0	1	0.00408246		neg P1 T1	18s	12.9608		neg P1 T1	CXCL11	31.7897	18.829	10.8926	0.000526015	2.14744e-06		neg P1 T6	18s	13.1908		neg P1 T6	CXCL11	33.4143	20.2236	12.2872	0.00020007	8.16778e-07
2	neg P2 T0	18S	18.9829		neg P2 T0	CXCL11	Undetectable						neg P2 T1	18s	15.1801		neg P2 T1	CXCL11	36.5298	21.3497			3.74202e-07	**	neg P2 T6	18s	*		neg P2 T6	CXCL11
3	neg P3 T0	18S	18.7428		neg P3 T0	CXCL11	34.6228	15.88	0	1	1.65823e-05		neg P3 T1	18s	13.0837		neg P3 T1	CXCL11	31.9113	18.8276	2.94756	0.129627	2.14952e-06		neg P3 T6	18s	15.1451		neg P3 T6	CXCL11	35.1397	19.9946	4.11461	0.057727	9.57249e-07
4	neg P4 T0	18S	18.7691		neg P4 T0	CXCL11	27.232	8.46292	0	1	0.00283405		neg P4 T1	18s	14.2156		neg P4 T1	CXCL11	27.4566	13.2409	4.778	0.0364485	0.000103297		neg P4 T6	18s	13.5779		neg P4 T6	CXCL11	32.9893	19.4114	10.9485	0.000506017	1.43408e-06
5	neg P5 T0	18S	21.7602		neg P5 T0	CXCL11	30.857	9.09679	0	1	0.00182638		neg P5 T1	18s	14.7782		neg P5 T1	CXCL11	27.727	12.9488	3.852	0.0692521	0.000126481		neg P5 T6	18s	15.1331		neg P5 T6	CXCL11	Undetectable
6	neg P6 T0	18S	18.7295		neg P6 T0	CXCL11	37.0186	18.2891	0	1	3.12194e-06		neg P6 T1	18s	16.7738		neg P6 T1	CXCL11	36.1226	19.3489	1.05972	0.479724	1.49767e-06		neg P6 T6	18s	15.7445		neg P6 T6	CXCL11	Undetectable
7	neg P7 T0	18S	21.4988		neg P7 T0	CXCL11	31.013	9.51424	0	1	0.0013675		neg P7 T1	18s	14.564		neg P7 T1	CXCL11	36.4523	21.8883	12.374	0.000188386	2.57617e-07		neg P7 T6	18s	20.3521		neg P7 T6	CXCL11	Undetectable
8	neg P8 T0	18S	21.6641		neg P8 T0	CXCL11	35.5284	13.8644	0	1	6.70515e-05		neg P8 T1	18s	14.031		neg P8 T1	CXCL11	33.6936	19.6626	5.79822	0.0179706	1.20495e-06		neg P8 T6	18s	16.7604		neg P8 T6	CXCL11	37.7543	20.9939	7.12954	0.00714157	4.78853e-07
9	neg P10 T0	18S	19.6667		neg P10 T0	CXCL11	34.9695	15.3028	0	1	2.47397e-05		neg P10 T1	18s	14.8048		neg P10 T1	CXCL11	34.484	19.6792	4.37644	0.0481461	1.19112e-06		neg P10 T6	18s	18.6327		neg P10 T6	CXCL11	Undetectable
10	neg P11 T0	18S	16.3181		neg P11 T0	CXCL11	29.4006	13.0825	0	1	0.000115285		neg P11 T1	18s	18.9151		neg P11 T1	CXCL11	36.2317	17.3167	4.23415	0.0531367	6.12588e-06		neg P11 T6	18s	18.7248		neg P11 T6	CXCL11	35.6117	16.8869	3.80441	0.0715743	8.25147e-06
11	neg P12 T0	18S	18.1056		neg P12 T0	CXCL11	34.4889	16.3833	0	1	1.16984e-05		neg P12 T1	18s	17.8433		neg P12 T1	CXCL11	34.6377	16.7944	0.411018	0.752092	8.79824e-06		neg P12 T6	18s	21.2113		neg P12 T6	CXCL11	36.2394	15.0281	-1.35519	2.55831	2.9928e-05
12	neg P13 T0	18S	18.9738		neg P13 T0	CXCL11	32.239	13.2652	0	1	0.00010157		neg P13 T1	18s	18.5976		neg P13 T1	CXCL11	35.1099	16.5123	3.24706	0.105327	1.06981e-05		neg P13 T6	18s	17.8078		neg P13 T6	CXCL11	34.7125	16.9047	3.63948	0.0802432	8.15034e-06
13	neg P17 T0	18S	21.8303		neg P17 T0	CXCL11	Undetectable						neg P17 T1	18s	17.5273		neg P17 T1	CXCL11	36.7145	19.1873			1.67518e-06	**	neg P17 T6	18s	16.4587		neg P17 T6	CXCL11	34.3529	17.8942			4.10488e-06	**
14	neg P18 T0	18S	19.8434		neg P18 T0	CXCL11	35.5903	15.7469	0	1	1.81854e-05		neg P18 T1	18s	20.3787		neg P18 T1	CXCL11	35.5519	15.1732	-0.573683	1.48832	2.70656e-05		neg P18 T6	18s	19.8845		neg P18 T6	CXCL11	36.8482	16.9637	1.21683	0.430227	7.82384e-06
1	pos P1 T0	18S	19.3138		pos P1 T0	CXCL11	Undetectable						pos P1 T1	18s	12.3671		pos P1 T1	CXCL11	33.0415	20.6744			5.97571e-07	**	pos P1 T6	18s	22.7702		pos P1 T6	CXCL11	Undetectable					**
2	pos P2 T0	18S	18.1797		pos P2 T0	CXCL11	33.4895	15.3098	0	1	2.46205e-05		pos P2 T1	18s	14.2611		pos P2 T1	CXCL11	32.1918	17.9308	2.621	0.162555	4.00218e-06		pos P2 T6	18s	23.4496		pos P2 T6	CXCL11	Undetectable
3	pos P3 T0	18S	17.3626		pos P3 T0	CXCL11	37.4829	20.1203	0	1	8.77358e-07		pos P3 T1	18s	12.5681		pos P3 T1	CXCL11	29.7562	17.1881	-2.93223	7.6329	6.69679e-06		pos P3 T6	18s	15.5913		pos P3 T6	CXCL11	37.622	22.0307	1.91039	0.266021	2.33396e-07
4	pos P4 T0	18S	17.9333		pos P4 T0	CXCL11	35.1917	17.2584	0	1	6.37808e-06		pos P4 T1	18s	13.4876		pos P4 T1	CXCL11	32.7242	19.2366	1.97817	0.253812	1.61884e-06		pos P4 T6	18s	15.7616		pos P4 T6	CXCL11	35.4625	19.7009	2.44242	0.183975	1.17341e-06
5	pos P5 T0	18S	20.1226		pos P5 T0	CXCL11	36.5812	16.4586	0	1	1.11041e-05		pos P5 T1	18s	13.7795		pos P5 T1	CXCL11	34.7097	20.9302	4.47164	0.0450714	5.00476e-07		pos P5 T6	18s	21.4501		pos P5 T6	CXCL11	Undetectable
6	pos P6 T0	18S	19.541		pos P6 T0	CXCL11	36.2808	16.7399	0	1	9.13692e-06		pos P6 T1	18s	*		pos P6 T1	CXCL11							pos P6 T6	18s	12.174		pos P6 T6	CXCL11	35.4119	23.2379	6.49807	0.0110633	1.01085e-07
7	pos P7 T0	18S	21.6167		pos P7 T0	CXCL11	36.8698	15.253	0	1	2.5608e-05		pos P7 T1	18s	13.6192		pos P7 T1	CXCL11	34.5208	20.9017	5.64862	0.0199341	5.10472e-07		pos P7 T6	18s	17.7019		pos P7 T6	CXCL11	Undetectable
8	pos P8 T0	18S	18.1689		pos P8 T0	CXCL11	36.6764	18.5076	0	1	2.68328e-06		pos P8 T1	18s	12.9669		pos P8 T1	CXCL11	34.184	21.2171	2.70955	0.152878	4.10214e-07		pos P8 T6	18s	13.1745		pos P8 T6	CXCL11	Undetectable
9	pos P9 T0	18S	17.8196		pos P9 T0	CXCL11	36.908	19.0884	0	1	1.79397e-06		pos P9 T1	18s	13.0472		pos P9 T1	CXCL11	36.6234	23.5762	4.4878	0.0445694	7.99562e-08		pos P9 T6	18s	13.5761		pos P9 T6	CXCL11	Undetectable
10	pos P10 T0	18S	18.497		pos P10 T0	CXCL11	37.3155	18.8184	0	1	2.16314e-06		pos P10 T1	18s	15.0326		pos P10 T1	CXCL11	36.4954	21.4628	2.64436	0.159944	3.45982e-07		pos P10 T6	18s	13.4513		pos P10 T6	CXCL11	36.2165	22.7651	3.9467	0.0648524	1.40285e-07
11	pos P11 T0	18S	18.3119		pos P11 T0	CXCL11	31.8393	13.5274	0	1	8.46917e-05		pos P11 T1	18s	12.0737		pos P11 T1	CXCL11	33.3337	21.26	7.73257	0.00470179	3.98202e-07		pos P11 T6	18s	14.7232		pos P11 T6	CXCL11	35.0195	20.2963	6.76888	0.00916987	7.76611e-07
12	pos P12 T0	18S	19.5179		pos P12 T0	CXCL11	35.7065	16.1886	0	1	1.3389e-05		pos P12 T1	18s	14.4787		pos P12 T1	CXCL11	35.1392	20.6605	4.47194	0.0450621	6.03335e-07		pos P12 T6	18s	17.5503		pos P12 T6	CXCL11	Undetectable
13	pos P13 T0	18S	17.9975		pos P13 T0	CXCL11	34.9603	16.9627	0	1	7.8291e-06		pos P13 T1	18s	14.7059		pos P13 T1	CXCL11	34.207	19.5011	2.53836	0.172139	1.34769e-06		pos P13 T6	18s	12.9019		pos P13 T6	CXCL11	36.0863	23.1844	6.22167	0.0133995	1.04906e-07
14	pos P14 T0	18S	19.3165		pos P14 T0	CXCL11	35.3943	16.0778	0	1	1.44575e-05		pos P14 T1	18s	12.1801		pos P14 T1	CXCL11	36.3636	24.1835	8.10572	0.00363025	5.24845e-08		pos P14 T6	18s	15.3498		pos P14 T6	CXCL11	Undetectable
15	pos P15 T0	18S	20.2625		pos P15 T0	CXCL11	37.2639	17.0014	0	1	7.62191e-06		pos P15 T1	18s	13.0065		pos P15 T1	CXCL11	30.8961	17.8897	0.888251	0.540269	4.11788e-06		pos P15 T6	18s	*		pos P15 T6	CXCL11
16	pos P16 T0	18S	17.4122		pos P16 T0	CXCL11	38.4212	21.009	0	1	4.7386e-07		pos P16 T1	18s	13.6409		pos P16 T1	CXCL11	35.1484	21.5075	0.49845	0.707867	3.35429e-07		pos P16 T6	18s	13.2476		pos P16 T6	CXCL11	35.8314	22.5838	1.57474	0.335704	1.59076e-07
17	pos P17 T0	18S	19.1289		pos P17 T0	CXCL11	34.9784	15.8496	0	1	1.69357e-05		pos P17 T1	18s	13.3675		pos P17 T1	CXCL11	35.82	22.4524	6.60285	0.0102883	1.74239e-07		pos P17 T6	18s	7.30818		pos P17 T6	CXCL11	7.46348	0.155301	-15.6943		0.897945
18	pos P18 T0	18S	20.0689		pos P18 T0	CXCL11	34.84	14.7712	0	1	3.57629e-05		pos P18 T1	18s	11.6075		pos P18 T1	CXCL11	32.9935	21.386	6.61483	0.0102033	3.64898e-07		pos P18 T6	18s	13.7434		pos P18 T6	CXCL11	37.2926	23.5492	8.778	0.00227802	8.14687e-08
19	pos P19 T0	18S	20.1103		pos P19 T0	CXCL11	34.5569	14.4466	0	1	4.47857e-05		pos P19 T1	18s	13.3566		pos P19 T1	CXCL11	36.6036	23.247	8.80041	0.00224291	1.0045e-07		pos P19 T6	18s	*		pos P19 T6	CXCL11
20	pos P20 T0	18S	18.2894		pos P20 T0	CXCL11	31.9025	13.6131	0	1	7.98102e-05		pos P20 T1	18s	12.2886		pos P20 T1	CXCL11	32.6769	20.3883	6.77521	0.00912976	7.28648e-07		pos P20 T6	18s	13.0753		pos P20 T6	CXCL11	35.4589	22.3836	8.77053	0.00228984	1.82753e-07
21	pos P21 T0	18S	21.4346		pos P21 T0	CXCL11	Undetectable						pos P21 T1	18s	13.618		pos P21 T1	CXCL11	33.2323	19.6142			1.24603e-06	**	pos P21 T6	18s	11.5357		pos P21 T6	CXCL11	33.6749					**
22	pos P22 T0	18S	17.6255		pos P22 T0	CXCL11	35.9141	18.2886	0	1	3.12306e-06		pos P22 T1	18s	14.8776		pos P22 T1	CXCL11	Undetectable						pos P22 T6	18s	12.6178		pos P22 T6	CXCL11	35.8861	23.2683	4.97968	0.0316932	9.89799e-08
23	pos P23 T0	18S	20.4148		pos P23 T0	CXCL11	36.2895	15.8748	0	1	1.66426e-05		pos P23 T1	18s	12.2209		pos P23 T1	CXCL11	35.3383	23.1174	7.24268	0.00660292	1.0989e-07		pos P23 T6	18s	*		pos P23 T6	CXCL11
24	pos P24 T0	18S	20.7094		pos P24 T0	CXCL11	37.5668	16.8573	0	1	8.4224e-06		pos P24 T1	18s	13.5436		pos P24 T1	CXCL11	34.131	20.5873	3.72999	0.0753633	6.34739e-07		pos P24 T6	18s	19.947		pos P24 T6	CXCL11	Undetectable
25	pos P26 T0	18S	23.3214		pos P26 T0	CXCL11	33.9346	10.6132	0	1	0.000638443		pos P26 T1	18s	18.2776		pos P26 T1	CXCL11	36.721	18.4434	7.83022	0.00439409	2.80538e-06		pos P26 T6	18s	*		pos P26 T6	CXCL11
	* Insufficient DNA
	** No calibrator available
	Undetectable= the probe was undetected in spite of having sufficient DNA

## Sheet: CCL4
	CCL4 T0												CCL4 T1													CCL4 T6
No.	Sample Name	Target Name	Cт Mean		Sample Name	Target Name	Cт Mean	∧CT	∧∧CT	2 -∧∧CT	RQ vs 18S		Sample Name	Target Name	Cт Mean		Sample Name	Target Name	Cт Mean	∧CT	∧∧CT	2 -∧∧CT	RQ vs 18S			Sample Name	Target Name	Cт Mean		Sample Name	Target Name	Cт Mean	∧CT	∧∧CT	2 -∧∧CT	RQ vs 18S
1	neg P1 T0	18S	20.2844		neg P1 T0	CCL4	27.3281	7.04367	0	1	0.00757956		neg P1 T1	18s	17.9353		neg P1 T1	CCL4	25.852	7.91675	0.873077	0.545981	0.00413829			neg P1 T6	18s	12.7737		neg P1 T6	CCL4	26.7109	13.9372	6.89353	0.00841088	6.37507e-05
2	neg P2 T0	18S	18.1923		neg P2 T0	CCL4	27.5765	9.38419	0	1	0.0014965		neg P2 T1	18s	17.0601		neg P2 T1	CCL4	30.1395	13.0794	3.69526	0.0772	0.00011553			neg P2 T6	18s	25.5097		neg P2 T6	CCL4	36.1049	10.5951	1.21095	0.431984	0.000646465
3	neg P3 T0	18S	17.1637		neg P3 T0	CCL4	27.188	10.0243	0	1	0.000960237		neg P3 T1	18s	17.277		neg P3 T1	CCL4	29.3726	12.0957	2.07134	0.237938	0.000228477			neg P3 T6	18s	15.5623		neg P3 T6	CCL4	28.2595	12.6972	2.67292	0.156809	0.000150574
4	neg P4 T0	18S	16.2986		neg P4 T0	CCL4	23.6846	7.38595	0	1	0.00597872		neg P4 T1	18s	18.2573		neg P4 T1	CCL4	25.3019	7.04469	-0.341255	1.26686	0.00757419			neg P4 T6	18s	13.9555		neg P4 T6	CCL4	26.7451	12.7896	5.40364	0.0236233	0.000141237
5	neg P5 T0	18S	20.2798		neg P5 T0	CCL4	28.4021	8.12226	0	1	0.00358885															neg P5 T6	18s	15.9878		neg P5 T6	CCL4	28.7162	12.7284	4.60611	0.0410605	0.00014736
6	neg P6 T0	18S	17.113		neg P6 T0	CCL4	26.5575	9.44443	0	1	0.0014353		neg P6 T1	18s	21.449		neg P6 T1	CCL4	32.8485	11.3996	1.95515	0.257895	0.000370156			neg P6 T6	18s	15.8256		neg P6 T6	CCL4	28.018	12.1924	2.748	0.148857	0.000213655
7	neg P7 T0	18S	18.8319		neg P7 T0	CCL4	25.9618	7.12985	0	1	0.00714003		neg P7 T1	18s	18.941		neg P7 T1	CCL4	28.7952	9.8541	2.72425	0.151328	0.00108049			neg P7 T6	18s	17.5752		neg P7 T6	CCL4	28.6803	11.1051	3.97526	0.0635809	0.00045397
8	neg P8 T0	18S	20.9743		neg P8 T0	CCL4	25.3919	4.41764	0	1	0.0467905		neg P8 T1	18s	18.8018		neg P8 T1	CCL4	27.1804	8.37856	3.96092	0.0642162	0.00300471			neg P8 T6	18s	17.2181		neg P8 T6	CCL4	29.3493	12.1312	7.71358	0.00476409	0.000222914
9	neg P10 T0	18S	19.4935		neg P10 T0	CCL4	24.4108	4.91724	0	1	0.0330951		neg P10 T1	18s	19.5568		neg P10 T1	CCL4	30.9211	11.3643	6.44709	0.0114613	0.000379311
10	neg P11 T0	18S	14.762		neg P11 T0	CCL4	19.6957	4.93379	0	1	0.0327177		neg P11 T1	18s	17.5003		neg P11 T1	CCL4	28.0833	10.583	5.64923	0.0199257	0.000651922			neg P11 T6	18S	17.2037		neg P11 T6	CCL4	29.8706	12.6669	7.73311	0.00470004	0.000153774
11	neg P12 T0	18S	18.5406		neg P12 T0	CCL4	25.435	6.89437	0	1	0.00840594		neg P12 T1	18s	17.5105		neg P12 T1	CCL4	26.0781	8.56762	1.67324	0.313548	0.00263567			neg P12 T6	18S	17.868		neg P12 T6	CCL4	32.1446	14.2766	7.38221	0.00599423	5.03871e-05
12	neg P13 T0	18S	16.4733		neg P13 T0	CCL4	22.1036	5.63029	0	1	0.0201889		neg P13 T1	18s	16.811		neg P13 T1	CCL4	24.2672	7.45627	1.82598	0.282049	0.00569427			neg P13 T6	18S	17.8856		neg P13 T6	CCL4	30.0647	12.1791	6.54881	0.010681	0.000215638
13	neg P17 T0	18S	20.084		neg P17 T0	CCL4	26.8706	6.78652	0	1	0.00905843															neg P17 T6	18S	14.025		neg P17 T6	CCL4	29.5225	15.4975	8.71096	0.00238638	2.16168e-05
14	neg P18 T0	18S	16.4534		neg P18 T0	CCL4	28.3597	11.9063	0	1	0.000260523															neg P18 T6	18S	16.9771		neg P18 T6	CCL4	29.9231	12.946	1.03967	0.486438	0.000126728
1	pos P1 T0	18S	15.5722		pos P1 T0	CCL4	25.234	9.66172	0	1	0.00123462		pos P1 T1	18s	19.6148		pos P1 T1	CCL4	31.9346	12.3198	2.65812	0.158426	0.000195595			pos P1 T6	18s	18.7302		pos P1 T6	CCL4	29.121	10.3908	0.72912	0.603272	0.000744811
2	pos P2 T0	18S	16.018		pos P2 T0	CCL4	22.7265	6.7085	0	1	0.00956181		pos P2 T1	18s	17.5619		pos P2 T1	CCL4	27.1198	9.55796	2.84946	0.138748	0.00132668			pos P2 T6	18s	14.0899		pos P2 T6	CCL4	27.0253	12.9354	6.22691	0.013351	0.000127659
3	pos P3 T0	18S	16.2587		pos P3 T0	CCL4	27.5866	11.328	0	1	0.000388994		pos P3 T1	18s	19.1016		pos P3 T1	CCL4	30.2236	11.1221	-0.2059	1.15341	0.000448668			pos P3 T6	18s	14.1634		pos P3 T6	CCL4	26.6395	12.4761	1.14812	0.451211	0.000175518
4	pos P4 T0	18S	16.8916		pos P4 T0	CCL4	25.9432	9.05154	0	1	0.00188458		pos P4 T1	18s	22.3846		pos P4 T1	CCL4	30.4205	8.0359	-1.01565	2.02181	0.00381026			pos P4 T6	18s	15.7306		pos P4 T6	CCL4	29.2586	13.5279	4.47639	0.0449232	8.46614e-05
5	pos P5 T0	18S	16.911		pos P5 T0	CCL4	26.6325	9.72152	0	1	0.00118449		pos P5 T1	18s	22.9415		pos P5 T1	CCL4	31.3022	8.36067	-1.36085	2.56837	0.0030422			pos P5 T6	18s	14.6409		pos P5 T6	CCL4	28.0491	13.4082	3.6867	0.0776591	9.19863e-05
6	pos P6 T0	18S	17.6234		pos P6 T0	CCL4	24.3098	6.68637	0	1	0.0097096		pos P6 T1	18s	*		pos P6 T1	CCL4								pos P6 T6	18s	13.5785		pos P6 T6	CCL4	20.5265	6.94806	0.261692	0.834109	0.00809886
7	pos P7 T0	18S	16.5582		pos P7 T0	CCL4	24.7997	8.24149	0	1	0.00330419		pos P7 T1	18s	23.9354		pos P7 T1	CCL4	31.5849	7.64953	-0.591953	1.50729	0.00498037			pos P7 T6	18s	14.6902		pos P7 T6	CCL4	27.4352	12.745	4.50348	0.0440876	0.000145674
8	pos P8 T0	18S	15.984		pos P8 T0	CCL4	25.0888	9.10479	0	1	0.00181629		pos P8 T1	18s	22.9821		pos P8 T1	CCL4	32.2441	9.26207	0.157276	0.896716	0.00162869			pos P8 T6	18s	12.5396		pos P8 T6	CCL4	26.0986	13.559	4.45416	0.045621	8.28608e-05
9	pos P9 T0	18S	15.3398		pos P9 T0	CCL4	24.1626	8.82284	0	1	0.00220832		pos P9 T1	18s	23.2453		pos P9 T1	CCL4	30.1624	6.91702	-1.90581	3.7472	0.00827501			pos P9 T6	18s	15.2686		pos P9 T6	CCL4	28.8894	13.6207	4.79789	0.0359494	7.93878e-05
10	pos P10 T0	18S	16.0966		pos P10 T0	CCL4	25.108	9.0114	0	1	0.00193775		pos P10 T1	18s	22.7495		pos P10 T1	CCL4	30.5709	7.82139	-1.19001	2.28154	0.00442106			pos P10 T6	18s	14.2578		pos P10 T6	CCL4	27.331	13.0733	4.06187	0.0598764	0.000116026
11	pos P11 T0	18S	16.2424		pos P11 T0	CCL4	21.7998	5.55739	0	1	0.0212353		pos P11 T1	18s	21.4339		pos P11 T1	CCL4	27.0687	5.6348	0.0774117	0.947756	0.0201259			pos P11 T6	18s	14.6907		pos P11 T6	CCL4	28.5372	13.8465	8.28911	0.00319691	6.78873e-05
12	pos P12 T0	18S	15.9047		pos P12 T0	CCL4	22.2435	6.33882	0	1	0.0123545		pos P12 T1	18s	13.3889		pos P12 T1	CCL4	24.3507	10.9619	4.62304	0.0405814	0.000501361			pos P12 T6	18s	15.4977		pos P12 T6	CCL4	29.6675	14.1698	7.83097	0.00439182	5.42586e-05
13	pos P13 T0	18S	15.7207		pos P13 T0	CCL4	22.6519	6.93117	0	1	0.00819428		pos P13 T1	18s	13.6012		pos P13 T1	CCL4	24.5876	10.9864	4.05525	0.0601515	0.000492899			pos P13 T6	18s	15.0179		pos P13 T6	CCL4	27.8773	12.8594	5.92819	0.0164224	0.00013457
14	pos P14 T0	18S	17.2986		pos P14 T0	CCL4	27.0628	9.76425	0	1	0.00114992		pos P14 T1	18s	15.9953		pos P14 T1	CCL4	28.9622	12.967	3.2027	0.108615	0.000124899			pos P14 T6	18s	13.6191		pos P14 T6	CCL4	27.0818	13.4626	3.69838	0.077033	8.85817e-05
15	pos P15 T0	18S	11.0056		pos P15 T0	CCL4	20.7044	9.69883	0	1	0.00120327		pos P15 T1	18s	16.8628		pos P15 T1	CCL4	29.9392	13.0764	3.37759	0.0962155	0.000115773			pos P15 T6	18s	14.4013		pos P15 T6	CCL4	27.3781	12.9768	3.27793	0.103097	0.000124053
16	pos P16 T0	18S	15.7264		pos P16 T0	CCL4	26.2327	10.5063	0	1	0.000687511															pos P16 T6	18s	12.7639		pos P16 T6	CCL4	26.0314	13.2674	2.76109	0.147513	0.000101417
17	pos P17 T0	18S	14.2731		pos P17 T0	CCL4	23.9322	9.65909	0	1	0.00123687															pos P17 T6	18s	12.9896		pos P17 T6	CCL4	25.2594	12.2698	2.61073	0.163716	0.000202495
18	pos P18 T0	18S	17.107		pos P18 T0	CCL4	24.2998	7.19278	0	1	0.00683529															pos P18 T6	18s	12.7219		pos P18 T6	CCL4	25.0796	12.3577	5.16496	0.0278735	0.000190523
19	pos P19 T0	18S	17.3902		pos P19 T0	CCL4	22.7091	5.31893	0	1	0.0250521															pos P19 T6	18s	10.6002		pos P19 T6	CCL4	23.4969	12.8967	7.57781	0.00523421	0.000131128
20	pos P20 T0	18S	15.3936		pos P20 T0	CCL4	19.8463	4.45265	0	1	0.0456687															pos P20 T6	18s	12.4253		pos P20 T6	CCL4	27.1469	14.7216	10.2689	0.000810498	3.70144e-05
21	pos P21 T0	18S	18.1698		pos P21 T0	CCL4	27.7121	9.54226	0	1	0.0013412															pos P21 T6	18s	12.7053		pos P21 T6	CCL4	25.7646	13.0593	3.51702	0.0873519	0.000117157
22	pos P22 T0	18S	16.2514		pos P22 T0	CCL4	23.6269	7.37543	0	1	0.00602245															pos P22 T6	18s	13.9115		pos P22 T6	CCL4	26.6687	12.7571	5.3817	0.0239854	0.000144451
23	pos P23 T0	18S	15.3936		pos P23 T0	CCL4	23.9769	8.58334	0	1	0.00260709															pos P23 T6	18s	14.4793		pos P23 T6	CCL4	25.9384	11.4591	2.87579	0.136239	0.000355188
24	pos P24 T0	18S	17.3572		pos P24 T0	CCL4	24.532	7.17481	0	1	0.00692096															pos P24 T6	18s	17.6303		pos P24 T6	CCL4	29.2299	11.5996	4.42481	0.0465585	0.000322229
25	pos P26 T0	18S	14.9605		pos P26 T0	CCL4	23.6781	8.71766	0	1	0.00237533															pos P26 T6	18s	*		pos P26 T6	CCL4
	* Insufficient DNA

## Sheet: IFI44
	IFI44 T0													IFI44 T1												IFI44 T6
No.	Sample Name	Target Name	Cт Mean		Sample Name	Target Name	Cт Mean	∧CT	∧∧CT	2 -∧∧CT	RQ vs 18S			Sample Name	Target Name	Cт Mean		Sample Name	Target Name	Cт Mean	∧CT	∧∧CT	2 -∧∧CT	RQ vs 18S		Sample Name	Target Name	Cт Mean		Sample Name	Target Name	Cт Mean	∧CT	∧∧CT	2 -∧∧CT	RQ vs 18S
1	neg P1 T0	18s	21.0866		neg P1 T0	IFI44	26.2192	5.13267	0	1	0.0285045			neg P1 T1	18s	*		neg P1 T1	IFI44							neg P1 T6	18S	16.8092		neg P1 T6	IFI44	29.5261	12.7168	7.58415	0.00521127	0.000148545
2	neg P2 T0	18s	18.9405		neg P2 T0	IFI44	29.2918	10.3513	0	1	0.000765512			neg P2 T1	18s	15.2403		neg P2 T1	IFI44	29.4427	14.2024	3.85112	0.069294	5.30454e-05		neg P2 T6	18S	*		neg P2 T6	IFI44
3	neg P3 T0	18s	18.8009		neg P3 T0	IFI44	29.6195	10.8186	0	1	0.000553702			neg P3 T1	18s	14.2102		neg P3 T1	IFI44	29.2183	15.0081	4.18945	0.0548087	3.03477e-05		neg P3 T6	18S	16.2661		neg P3 T6	IFI44	29.7236	13.4576	2.63896	0.160544	8.88934e-05
4	neg P4 T0	18s	19.0533		neg P4 T0	IFI44	26.8456	7.79227	0	1	0.0045112			neg P4 T1	18s	14.7537		neg P4 T1	IFI44	29.7629	15.0092	7.21693	0.00672184	3.03235e-05		neg P4 T6	18S	16.2023		neg P4 T6	IFI44	27.734	11.5317	3.73943	0.0748721	0.000337763
5	neg P5 T0	18s	23.4867		neg P5 T0	IFI44	30.3311	6.84443	0	1	0.00870205			neg P5 T1	18s	13.5171		neg P5 T1	IFI44	28.1781	14.661	7.81657	0.00443587	3.86012e-05		neg P5 T6	18S	17.0682		neg P5 T6	IFI44	27.7645	10.6963	3.85189	0.0692571	0.000602679
6	neg P6 T0	18s	17.9376		neg P6 T0	IFI44	30.8641	12.9264	0	1	0.000128456			neg P6 T1	18s	17.2098		neg P6 T1	IFI44	32.9849	15.7751	2.84864	0.138827	1.78331e-05		neg P6 T6	18S	17.1366		neg P6 T6	IFI44	29.6928	12.5563	-0.370173	1.29251	0.00016603
7	neg P7 T0	18s	20.6973		neg P7 T0	IFI44	28.4611	7.7639	0	1	0.00460081			neg P7 T1	18s	15.3814		neg P7 T1	IFI44	29.3495	13.9681	6.20419	0.0135629	6.24003e-05		neg P7 T6	18S	19.4866		neg P7 T6	IFI44	29.5251	10.0385	2.2746	0.20667	0.00095085
8	neg P8 T0	18s	21.7512		neg P8 T0	IFI44	29.9512	8.2	0	1	0.00340059			neg P8 T1	18s	15.4507		neg P8 T1	IFI44	30.2374	14.7868	6.58676	0.0104037	3.53788e-05		neg P8 T6	18S	18.1498		neg P8 T6	IFI44	29.5271	11.3773	3.17728	0.110546	0.000375923
9	neg P10 T0	18s	18.6299		neg P10 T0	IFI44	30.1034	11.4735	0	1	0.000351669			neg P10 T1	18s	15.8895		neg P10 T1	IFI44	30.1367	14.2472	2.77367	0.146232	5.14253e-05		neg P10 T6	18S	16.6627		neg P10 T6	IFI44	29.3188	12.6561	1.18263	0.440547	0.000154927
10	neg P11 T0	18s	16.8515		neg P11 T0	IFI44	29.4055	12.554	0	1	0.000166291			neg P11 T1	18s	15.2306		neg P11 T1	IFI44	29.7365	14.506	1.95197	0.258463	4.298e-05		neg P11 T6	18S	20.4444		neg P11 T6	IFI44	30.8808	10.4364	-2.11762	4.33978	0.000721667
11	neg P12 T0	18s	20.0296		neg P12 T0	IFI44	30.1952	10.1656	0	1	0.00087067			neg P12 T1	18s	15.6483		neg P12 T1	IFI44	29.5634	13.9151	3.74952	0.0743503	6.47346e-05		neg P12 T6	18S	18.1032		neg P12 T6	IFI44	28.0456	9.94236	-0.223228	1.16734	0.00101637
12	neg P13 T0	18s	20.8699		neg P13 T0	IFI44	30.6231	9.75316	0	1	0.00115879			neg P13 T1	18s	15.17		neg P13 T1	IFI44	29.2234	14.0534	4.30019	0.0507591	5.88192e-05		neg P13 T6	18S	22.4721		neg P13 T6	IFI44	29.932	7.45992	-2.29324	4.90156	0.00567988
13	neg P17 T0	18s	22.1003		neg P17 T0	IFI44	31.557	9.45676	0	1	0.00142308			neg P17 T1	18s	15.0855		neg P17 T1	IFI44	30.1254	15.04	5.58323	0.0208584	2.96832e-05		neg P17 T6	18S	18.2624		neg P17 T6	IFI44	29.5615	11.2991	1.84237	0.278863	0.000396845
14	neg P18 T0	18s	19.4053		neg P18 T0	IFI44	27.0787	7.67339	0	1	0.0048987			neg P18 T1	18s	15.7376		neg P18 T1	IFI44	29.3323	13.5947	5.92136	0.0165003	8.08302e-05		neg P18 T6	18S	21.3826		neg P18 T6	IFI44	30.4619	9.07933	1.40594	0.377372	0.00184863
1	pos P1 T0	18s	17.4181		pos P1 T0	IFI44	30.2519	12.8338	0	1	0.000136977			pos P1 T1	18s	16.3221		pos P1 T1	IFI44	28.9657	12.6435	-0.190256	1.14097	0.000156286		pos P1 T6	18S	18.6192		pos P1 T6	IFI44	30.4789	11.8597	-0.974083	1.96439	0.000269076
2	pos P2 T0	18s	18.8302		pos P2 T0	IFI44	28.3036	9.47346	0	1	0.00140671			pos P2 T1	18s	12.3128		pos P2 T1	IFI44	27.9055	15.5927	6.11929	0.014385	2.02356e-05		pos P2 T6	18S	19.0333		pos P2 T6	IFI44	30.8539	11.8207	2.3472	0.196527	0.000276456
3	pos P3 T0	18s	17.9809		pos P3 T0	IFI44	28.7835	10.8026	0	1	0.000559871			pos P3 T1	18s	14.6178		pos P3 T1	IFI44	28.9932	14.3754	3.57283	0.0840371	4.705e-05		pos P3 T6	18S	16.6819		pos P3 T6	IFI44	29.8625	13.1806	2.37797	0.19238	0.000107708
4	pos P4 T0	18s	18.5645		pos P4 T0	IFI44	22.0221	3.45761	0	1	0.0910242			pos P4 T1	18s	17.7335		pos P4 T1	IFI44	31.5758	13.8423	10.3847	0.000747984	6.80847e-05		pos P4 T6	18S	14.8046		pos P4 T6	IFI44	27.1047	12.3001	8.84247	0.00217846	0.000198293
5	pos P5 T0	18s	20.1366		pos P5 T0	IFI44	31.2717	11.1352	0	1	0.000444605			pos P5 T1	18s	12.8172		pos P5 T1	IFI44	29.9571	17.1399	6.00471	0.015574	6.92429e-06		pos P5 T6	18S	16.738		pos P5 T6	IFI44	30.0969	13.3588	2.22362	0.214103	9.51913e-05
6	pos P6 T0	18s	19.9275		pos P6 T0	IFI44	28.8003	8.87285	0	1	0.00213308			pos P6 T1	18s	14.7116		pos P6 T1	IFI44	28.7251	14.0135	5.14061	0.028348	6.04686e-05		pos P6 T6	18S	16.8352		pos P6 T6	IFI44	29.9749	13.1397	4.26688	0.0519448	0.000110802
7	pos P7 T0	18s	24.5631		pos P7 T0	IFI44	30.1426	5.57959	0	1	0.0209111			pos P7 T1	18s	14.8367		pos P7 T1	IFI44	29.9349	15.0982	9.51862	0.00136336	2.85094e-05		pos P7 T6	18S	19.3184		pos P7 T6	IFI44	30.5258	11.2074	5.62783	0.0202233	0.000422893
8	pos P8 T0	18s	19.7894		pos P8 T0	IFI44	31.0668	11.2774	0	1	0.00040286			pos P8 T1	18s	14.5167		pos P8 T1	IFI44	31.7103	17.1936	5.9162	0.0165594	6.67113e-06		pos P8 T6	18S	13.7367		pos P8 T6	IFI44	27.1997	13.463	2.18556	0.219827	8.85593e-05
9	pos P9 T0	18s	16.7054		pos P9 T0	IFI44	29.6375	12.9322	0	1	0.000127947			pos P9 T1	18s	12.1509		pos P9 T1	IFI44	28.4322	16.2814	3.34921	0.0981265	1.2555e-05		pos P9 T6	18S	16.3406		pos P9 T6	IFI44	29.911	13.5704	0.63825	0.642492	8.22046e-05
10	pos P10 T0	18s	16.6471		pos P10 T0	IFI44	29.0074	12.3603	0	1	0.000190192			pos P10 T1	18s	14.0098		pos P10 T1	IFI44	30.0716	16.0618	3.70154	0.0768646	1.4619e-05		pos P10 T6	18S	17.0669		pos P10 T6	IFI44	29.3515	12.2846	-0.0756626	1.05384	0.000200433
11	pos P11 T0	18s	17.6977		pos P11 T0	IFI44	29.8424	12.1447	0	1	0.000220846			pos P11 T1	18s	12.2437		pos P11 T1	IFI44	29.0883	16.8446	4.69992	0.0384753	8.49713e-06		pos P11 T6	18S	16.3418		pos P11 T6	IFI44	27.2757	10.9339	-1.21076	2.3146	0.000511171
12	pos P12 T0	18s	20.1117		pos P12 T0	IFI44	30.2466	10.1349	0	1	0.000889383			pos P12 T1	18s	12.91		pos P12 T1	IFI44	29.2234	16.3135	6.17858	0.0138058	1.22786e-05		pos P12 T6	18S	20.8391		pos P12 T6	IFI44	30.5599	9.72085	-0.414055	1.33243	0.00118504
13	pos P13 T0	18s	19.348		pos P13 T0	IFI44	30.2782	10.9302	0	1	0.00051248			pos P13 T1	18s	15.9374		pos P13 T1	IFI44	30.8736	14.9362	4.00597	0.0622421	3.18978e-05		pos P13 T6	18S	15.8287		pos P13 T6	IFI44	27.9579	12.1293	1.19906	0.435558	0.000223215
14	pos P14 T0	18s	20.4261		pos P14 T0	IFI44	29.9557	9.52966	0	1	0.00135297			pos P14 T1	18s	16.4114		pos P14 T1	IFI44	30.4596	14.0483	4.5186	0.0436281	5.90274e-05		pos P14 T6	18S	16.9201		pos P14 T6	IFI44	28.968	12.0479	2.51829	0.17455	0.00023616
15	pos P15 T0	18s	19.1744		pos P15 T0	IFI44	28.4422	9.26778	0	1	0.00162226			pos P15 T1	18s	18.6891		pos P15 T1	IFI44	29.6708	10.9817	1.7139	0.304835	0.000494522		pos P15 T6	18S	17.6665		pos P15 T6	IFI44	28.8166	11.1501	1.88229	0.271252	0.000440042
16	pos P16 T0	18s	20.973		pos P16 T0	IFI44	30.2616	9.28861	0	1	0.001599			pos P16 T1	18s	17.4317		pos P16 T1	IFI44	30.7962	13.3645	4.07588	0.0592977	9.4817e-05		pos P16 T6	18S	15.0072		pos P16 T6	IFI44	27.565	12.5579	3.26925	0.103719	0.000165847
17	pos P17 T0	18s	18.0282		pos P17 T0	IFI44	28.2701	10.242	0	1	0.000825765			pos P17 T1	18s	15.3849		pos P17 T1	IFI44	28.5037	13.1188	2.87679	0.136144	0.000112423		pos P17 T6	18S	14.8844		pos P17 T6	IFI44	28.6357	13.7512	3.50924	0.0878239	7.25219e-05
18	pos P18 T0	18s	19.9022		pos P18 T0	IFI44	29.5658	9.66353	0	1	0.00123307			pos P18 T1	18s	16.9028		pos P18 T1	IFI44	30.4736	13.5708	3.90729	0.0666481	8.21815e-05		pos P18 T6	18S	14.643		pos P18 T6	IFI44	28.7114	14.0685	4.40493	0.0472046	5.82065e-05
19	pos P19 T0	18s	19.5867		pos P19 T0	IFI44	30.8603	11.2736	0	1	0.000403931			pos P19 T1	18s	16.2046		pos P19 T1	IFI44	30.3154	14.1107	2.8371	0.139942	5.65268e-05		pos P19 T6	18S	15.715		pos P19 T6	IFI44	30.2375	14.5225	3.24891	0.105191	4.24901e-05
20	pos P20 T0	18s	17.6193		pos P20 T0	IFI44	28.6439	11.0245	0	1	0.000480047			pos P20 T1	18s	*		pos P20 T1	IFI44							pos P20 T6	18S	14.7384		pos P20 T6	IFI44	28.9179	14.1796	3.15505	0.112263	5.38915e-05
21	pos P21 T0	18s	21.2737		pos P21 T0	IFI44	32.3795	11.1058	0	1	0.000453748			pos P21 T1	18s	*		pos P21 T1	IFI44							pos P21 T6	18S	13.7316		pos P21 T6	IFI44	26.9886	13.257	2.15118	0.225129	0.000102152
22	pos P22 T0	18s	19.9283		pos P22 T0	IFI44	30.7492	10.8209	0	1	0.000552828			pos P22 T1	18s	16.2956		pos P22 T1	IFI44	30.5553	14.2597	3.43883	0.0922169	5.09801e-05		pos P22 T6	18S	15.9664		pos P22 T6	IFI44	29.5789	13.6125	2.79161	0.144424	7.9842e-05
23	pos P23 T0	18s	21.9484		pos P23 T0	IFI44	31.7532	9.80477	0	1	0.00111807			pos P23 T1	18s	18.8039		pos P23 T1	IFI44	30.4244	11.6205	1.81576	0.284055	0.000317594		pos P22 T6	18S	16.9664		pos P23 T6	IFI44	30.672	13.7056	3.90087	0.0669453	7.48497e-05
24	pos P24 T0	18s	19.8455		pos P24 T0	IFI44	29.8837	10.0382	0	1	0.000951046			pos P24 T1	18s	17.5935		pos P24 T1	IFI44	29.3455	11.752	1.71384	0.304848	0.000289925		pos P24 T6	18S	16.0947		pos P24 T6	IFI44	28.9195	12.8248	2.78664	0.144923	0.000137829
25	pos P26 T0	18s	20.7264		pos P26 T0	IFI44	27.8135	7.08714	0	1	0.00735456			pos P26 T1	18s	15.6546		pos P26 T1	IFI44	30.4965	14.8418	7.75469	0.00463026	3.40536e-05		pos P26 T6	18S	20.9477		pos P26 T6	IFI44	31.6148	10.6671	3.58	0.0836204	0.000614991
	* Insufficient DNA

## Sheet: IFI44L
	IFI44L T0													IFI44L T1													IFI44L T6
No.	Sample Name	Target Name	Cт Mean		Sample Name	Target Name	Cт Mean	∧CT	∧∧CT	2 -∧∧CT	RQ vs 18S			Sample Name	Target Name	Cт Mean		Sample Name	Target Name	Cт Mean	∧CT	∧∧CT	2 -∧∧CT	RQ vs 18S			Sample Name	Target Name	Cт Mean		Sample Name	Target Name	Cт Mean	∧CT	∧∧CT	2 -∧∧CT	RQ vs 18S
1	neg P1 T0	18s	15.3806		neg P1 T0	IFI44L	31.0709	15.6903	0	1	1.89126e-05			neg P1 T1	18S	14.9791		neg P1 T1	IFI44L	32.6781	17.699	2.0087	0.248496	4.69971e-06			neg P1 T6	18s	14.7008		neg P1 T6	IFI44L	28.4498	13.749	-1.94125	3.84039	7.26317e-05
2	neg P2 T0	18s	12.3525		neg P2 T0	IFI44L	31.1779	18.8254	0	1	2.15266e-06			neg P2 T1	18S	16.5722		neg P2 T1	IFI44L	33.3645	16.7923	-2.03315	4.09298	8.81081e-06			neg P2 T6	18s	*		neg P2 T6	IFI44L	37.149
3	neg P3 T0	18s	13.6488		neg P3 T0	IFI44L	32.6232	18.9744	0	1	1.94153e-06			neg P3 T1	18S	14.1289		neg P3 T1	IFI44L	32.4426	18.3138	-0.660623	1.58076	3.0691e-06			neg P3 T6	18s	16.795		neg P3 T6	IFI44L	32.3053	15.5103	-3.46406	11.0354	2.14255e-05
4	neg P4 T0	18s	13.6794		neg P4 T0	IFI44L	32.1297	18.4503	0	1	2.79189e-06			neg P4 T1	18S	16.3558		neg P4 T1	IFI44L	33.489	17.1332	-1.31713	2.49169	6.95654e-06			neg P4 T6	18s	15.2363		neg P4 T6	IFI44L	28.4987	13.2625	-5.18787	36.4506	0.000101766
5	neg P5 T0	18s	16.6294		neg P5 T0	IFI44L	34.8792	18.2498	0	1	3.20832e-06			neg P5 T1	18S	14.7221		neg P5 T1	IFI44L	31.8337	17.1116	-1.13814	2.20098	7.06144e-06			neg P5 T6	18s	16.4933		neg P5 T6	IFI44L	29.6851	13.1918	-5.05797	33.312	0.000106875
6	neg P6 T0	18s	13.4911		neg P6 T0	IFI44L	33.1452	19.6541	0	1	1.21203e-06			neg P6 T1	18S	17.826		neg P6 T1	IFI44L	36.331	18.505	-1.14913	2.21781	2.68804e-06			neg P6 T6	18s	17.6157		neg P6 T6	IFI44L	31.9289	14.3132	-5.34098	40.5317	4.91254e-05
7	neg P7 T0	18s	14.6341		neg P7 T0	IFI44L	33.0728	18.4387	0	1	2.81441e-06			neg P7 T1	18S	15.7254		neg P7 T1	IFI44L	32.2293	16.5039	-1.93482	3.8233	1.07604e-05			neg P7 T6	18s	19.8838		neg P7 T6	IFI44L	32.847	12.9632	-5.47552	44.4935	0.000125223
8	neg P8 T0	18s	16.9305		neg P8 T0	IFI44L	33.8775	16.9471	0	1	7.91456e-06			neg P8 T1	18S	16.148		neg P8 T1	IFI44L	33.7218	17.5738	0.626751	0.647633	5.12573e-06			neg P8 T6	18s	18.5342		neg P8 T6	IFI44L	32.2914	13.7572	-3.18982	9.12499	7.22203e-05
9	neg P10 T0	18s	14.7704		neg P10 T0	IFI44L	33.8459	19.0755	0	1	1.81004e-06			neg P10 T1	18S	15.9101		neg P10 T1	IFI44L	32.9022	16.9921	-2.08344	4.23817	7.67128e-06			neg P10 T6	18s	19.9013		neg P10 T6	IFI44L	32.4716	12.5703	-6.50529	90.8419	0.000164428
10	neg P11 T0	18s	14.6332		neg P11 T0	IFI44L	31.0118	16.3787	0	1	1.17362e-05			neg P11 T1	18s	18.6561		neg P11 T1	IFI44L	35.3576	16.7015	0.322783	0.799526	9.38336e-06			neg P11 T6	18s	21.0949		neg P11 T6	IFI44L	33.7692	12.6743	-3.7044	13.0357	0.000152989
11	neg P12 T0	18s	28.7495		neg P12 T0	IFIT44L	36.9545	8.20498	0	1	0.00338888			neg P12 T1	18s	18.8463		neg P12 T1	IFI44L	32.5274	13.6811	5.47613	0.0224658	7.61339e-05			neg P12 T6	18s	19.6794		neg P12 T6	IFI44L	29.6518	9.9724	1.76743	0.293732	0.000995424
12	neg P13 T0	18s	23.94		neg P13 T0	IFIT44L	35.0876	11.1476	0	1	0.00044079			neg P13 T1	18s	19.1442		neg P13 T1	IFI44L	34.1307	14.9866	3.83897	0.0698803	3.08026e-05			neg P13 T6	18s	19.2804		neg P13 T6	IFI44L	30.6439	11.3635	0.215876	0.861023	0.000379531
13	neg P17 T0	18s	17.9575		neg P17 T0	IFIT44L	33.7366	15.7791	0	1	1.77831e-05			neg P17 T1	18s	18.7364		neg P17 T1	IFI44L	35.2772	16.5409	0.761732	0.589788	1.04882e-05			neg P17 T6	18s	19.353		neg P17 T6	IFI44L	31.9661	12.6131	-3.16606	8.97592	0.000159619
14	neg P18 T0	18s	17.8285		neg P18 T0	IFIT44L	33.5329	15.7044	0	1	1.87291e-05			neg P18 T1	18s	20.9146		neg P18 T1	IFI44L	34.8575	13.9429	-1.76146	3.39042	6.34996e-05			neg P18 T6	18s	*		neg P18 T6	IFI44L
1	pos P1 T0	18s	12.0623		pos P1 T0	IFI44L	32.3406	20.2782	0	1	7.86401e-07			pos P1 T1	18S	13.4469		pos P1 T1	IFI44L	32.572	19.1251	-1.15314	2.22397	1.74893e-06			pos P1 T6	18s	21.1845		pos P1 T6	IFI44L	32.465	11.2805	-8.99778	511.212	0.000402018
2	pos P2 T0	18s	13.6513		pos P2 T0	IFI44L	32.7361	19.0848	0	1	1.79843e-06			pos P2 T1	18S	14.3923		pos P2 T1	IFI44L	32.7696	18.3773	-0.70756	1.63304	2.93691e-06			pos P2 T6	18s	19.1772		pos P2 T6	IFI44L	34.4823	15.3051	-3.77971	13.7342	2.47001e-05
3	pos P3 T0	18s	13.2354		pos P3 T0	IFI44L	32.4374	19.202	0	1	1.65818e-06			pos P3 T1	18S	13.6137		pos P3 T1	IFI44L	31.9617	18.348	-0.853983	1.80748	2.99713e-06			pos P3 T6	18s	17.6731		pos P3 T6	IFI44L	32.8755	15.2024	-3.99961	15.9956	2.65236e-05
4	pos P4 T0	18s	12.777		pos P4 T0	IFI44L	30.5617	17.7847	0	1	4.42868e-06			pos P4 T1	18S	13.8655		pos P4 T1	IFI44L	31.1583	17.2928	-0.491903	1.4063	6.22805e-06			pos P4 T6	18s	14.9627		pos P4 T6	IFI44L	28.7608	13.7981	-3.98661	15.8521	7.02041e-05
5	pos P5 T0	18s	12.5278		pos P5 T0	IFI44L	33.3818	20.854	0	1	5.2763e-07			pos P5 T1	18S	13.0158		pos P5 T1	IFI44L	32.1058	19.0901	-1.7639	3.39615	1.79191e-06			pos P5 T6	18s	17.0088		pos P5 T6	IFI44L	32.0647	15.0559	-5.79809	55.6414	2.93581e-05
6	pos P6 T0	18s	12.6307		pos P6 T0	IFI44L	30.4115	17.7808	0	1	4.44066e-06			pos P6 T1	18S	*		pos P6 T1	IFI44L								pos P6 T6	18s	15.009		pos P6 T6	IFI44L	30.5367	15.5277	-2.25314	4.76719	2.11695e-05
7	pos P7 T0	18s	15.3674		pos P7 T0	IFI44L	33.6357	18.2684	0	1	3.16715e-06			pos P7 T1	18S	15.059		pos P7 T1	IFI44L	33.0759	18.0169	-0.251503	1.19045	3.77032e-06			pos P7 T6	18s	18.3885		pos P7 T6	IFI44L	32.5727	14.1842	-4.08419	16.9615	5.37196e-05
8	pos P8 T0	18s	12.9988		pos P8 T0	IFI44L	30.7127	17.7138	0	1	4.65162e-06			pos P8 T1	18S	13.8121		pos P8 T1	IFI44L	32.7318	18.9197	1.20584	0.433517	2.01656e-06			pos P8 T6	18s	13.598		pos P8 T6	IFI44L	29.109	15.511	-2.20284	4.60386	2.14154e-05
9	pos P9 T0	18s	12.4706		pos P9 T0	IFI44L	33.6753	21.2047	0	1	4.13759e-07			pos P9 T1	18S	13.1711		pos P9 T1	IFI44L	33.7374	20.5663	-0.638388	1.55659	6.44053e-07			pos P9 T6	18s	16.7757		pos P9 T6	IFI44L	31.9478	15.1721	-6.03264	65.4647	2.70866e-05
10	pos P10 T0	18s	11.968		pos P10 T0	IFI44L	32.4202	20.4522	0	1	6.97071e-07			pos P10 T1	18S	15.0185		pos P10 T1	IFI44L	32.5847	17.5662	-2.88602	7.39231	5.15296e-06			pos P10 T6	18s	16.3386		pos P10 T6	IFI44L	31.8682	15.5296	-4.92257	30.3279	2.11407e-05
11	pos P11 T0	18s	12.3384		pos P11 T0	IFI44L	30.3014	17.963	0	1	3.91389e-06			pos P11 T1	18S	13.9939		pos P11 T1	IFI44L	34.9174	20.9235	2.96056	0.128465	5.02796e-07			pos P11 T6	18s	16.4229		pos P11 T6	IFI44L	29.1681	12.7453	-5.2177	37.2122	0.000145644
12	pos P12 T0	18s	11.3586		pos P12 T0	IFI44L	29.7305	18.3719	0	1	2.94788e-06			pos P12 T1	18S	15.4265		pos P12 T1	IFI44L	31.9405	16.5141	-1.85784	3.62464	1.0685e-05			pos P12 T6	18s	17.0275		pos P12 T6	IFI44L	31.5418	14.5143	-3.85757	14.4959	4.27322e-05
13	pos P13 T0	18s	12.9247		pos P13 T0	IFI44L	32.4143	19.4897	0	1	1.35838e-06			pos P13 T1	18S	14.2438		pos P13 T1	IFI44L	32.7733	18.5294	-0.960236	1.94563	2.6429e-06			pos P13 T6	18s	16.6818		pos P13 T6	IFI44L	31.0227	14.3409	-5.1488	35.4768	4.8191e-05
14	pos P14 T0	18s	13.4704		pos P14 T0	IFI44L	33.9032	20.4327	0	1	7.06532e-07			pos P14 T1	18S	12.8906		pos P14 T1	IFI44L	33.017	20.1264	-0.306383	1.2366	8.737e-07			pos P14 T6	18s	16.2073		pos P14 T6	IFI44L	31.2783	15.0709	-5.3618	41.121	2.90533e-05
15	pos P15 T0	18s	13.7601		pos P15 T0	IFI44L	31.928	18.1679	0	1	3.39568e-06			pos P15 T1	18S	14.8752		pos P15 T1	IFI44L	32.606	17.7308	-0.437043	1.35383	4.59716e-06			pos P15 T6	18s	17.4057		pos P15 T6	IFI44L	31.3818	13.9761	-4.19177	18.2747	6.20548e-05
16	pos P16 T0	18s	12.5328		pos P16 T0	IFI44L	31.0071	18.4743	0	1	2.74593e-06			pos P16 T1	18S	15.0291		pos P16 T1	IFI44L	33.4873	18.4582	-0.0161047	1.01123	2.77675e-06			pos P16 T6	18s	15.2763		pos P16 T6	IFI44L	28.9873	13.711	-4.7633	27.158	7.45739e-05
17	pos P17 T0	18s	12.1354		pos P17 T0	IFI44L	33.3997	21.2643	0	1	3.97013e-07			pos P17 T1	18S	13.8064		pos P17 T1	IFI44L	34.183	20.3766	-0.887714	1.85024	7.34571e-07			pos P17 T6	18s	*		pos P17 T6	IFI44L
18	pos P18 T0	18s	11.3614		pos P18 T0	IFI44L	32.0385	20.6771	0	1	5.96436e-07			pos P18 T1	18S	12.6091		pos P18 T1	IFI44L	31.7458	19.1368	-1.54034	2.90863	1.73481e-06			pos P18 T6	18s	14.0897		pos P18 T6	IFI44L	30.6335	16.5438	-4.1333	17.5488	1.04667e-05
19	pos P19 T0	18s	12.3639		pos P19 T0	IFI44L	34.1639	21.8001	0	1	2.73854e-07			pos P19 T1	18S	12.8785		pos P19 T1	IFI44L	30.1195	17.241	-4.55912	23.5739	6.45581e-06			pos P19 T6	18s	15.6173		pos P19 T6	IFI44L	34.016	18.3987	-3.40135	10.5659	2.89353e-06
20	pos P20 T0	18s	12.0744		pos P20 T0	IFI44L	32.758	20.6836	0	1	5.93772e-07			pos P20 T1	18S	12.4338		pos P20 T1	IFI44L	31.9529	19.5192	-1.16441	2.24141	1.33089e-06			pos P20 T6	18s	14.4123		pos P20 T6	IFI44L	31.2589	16.8466	-3.83698	14.2904	8.48526e-06
21	pos P21 T0	18s	12.4839		pos P21 T0	IFI44L	32.436	19.9521	0	1	9.85881e-07			pos P21 T1	18S	13.1148		pos P21 T1	IFI44L	32.5816	19.4668	-0.485304	1.39988	1.38012e-06			pos P21 T6	18s	14.3356		pos P21 T6	IFI44L	29.6369	15.3013	-4.65075	25.1197	2.4765e-05
22	pos P22 T0	18s	11.6316		pos P22 T0	IFI44L	32.864	21.2324	0	1	4.05894e-07			pos P22 T1	18S	16.1708		pos P22 T1	IFI44L	34.5751	18.4042	-2.82816	7.10167	2.88252e-06			pos P22 T6	18s	16.2484		pos P22 T6	IFI44L	31.963	15.7146	-5.51776	45.8155	1.85962e-05
23	pos P23 T0	18s	13.9893		pos P23 T0	IFI44L	32.9595	18.9702	0	1	1.94717e-06			pos P23 T1	18S	15.485		pos P23 T1	IFI44L	33.8681	18.3831	-0.587098	1.50222	2.92509e-06			pos P23 T6	18s	17.5392		pos P23 T6	IFI44L	31.6473	14.1081	-4.86211	29.083	5.66297e-05
24	pos P24 T0	18s	12.215		pos P24 T0	IFI44L	29.7944	17.5794	0	1	5.10606e-06			pos P24 T1	18S	15.9613		pos P24 T1	IFI44L	30.0041	14.0428	-3.53655	11.604	5.92508e-05			pos P24 T6	18s	17.3226		pos P24 T6	IFI44L	31.6753	14.3527	-3.22666	9.36099	4.77978e-05
25	pos P26 T0	18s	16.2005		pos P26 T0	IFIT44L	27.0058	10.8053	0	1	0.000558834			pos P26 T1	18s	18.2776		pos P26 T1	IFI44L	32.4736	14.1959	3.39065	0.095348	5.32837e-05			pos P26 T6	18s	22.723		pos P26 T6	IFI44L	33.0809	10.3579	-0.447374	1.36356	0.000762002
	* Insufficient DNA

[truncated: 5 more sheets: IFNA, RSAD2, IL2RA, USP18, IFIT1]
